# Supplementary material for: Exploitation of pseudo-symmetry in the Cambridge Structural Database for molecular ferroelectric discovery
Source: Royal Society of Chemistry journal article supplement (doi:10.1039/d5ce00445d), 2025-01-01
Supplement: d5ce00445d1.zip [file d5ce00445d1.zip]

# Exploitation of pseudo-symmetry in the Cambridge Structural Database for molecular ferroelectric discovery

Sam Y. Thompson,<sup>a</sup> Harold T. Stokes,<sup>b</sup> Branton J. Campbell,<sup>b</sup> Elliot D. Goldberg<sup>a</sup> and John S. O. Evans<sup>\*a</sup>

<sup>a</sup>Department of Chemistry, Science Site, Durham University, Durham DH1 3LE, United Kingdom

<sup>b</sup>Department of Physics & Astronomy, Brigham Young University, Provo, Utah 84602, United States

## Supplementary information

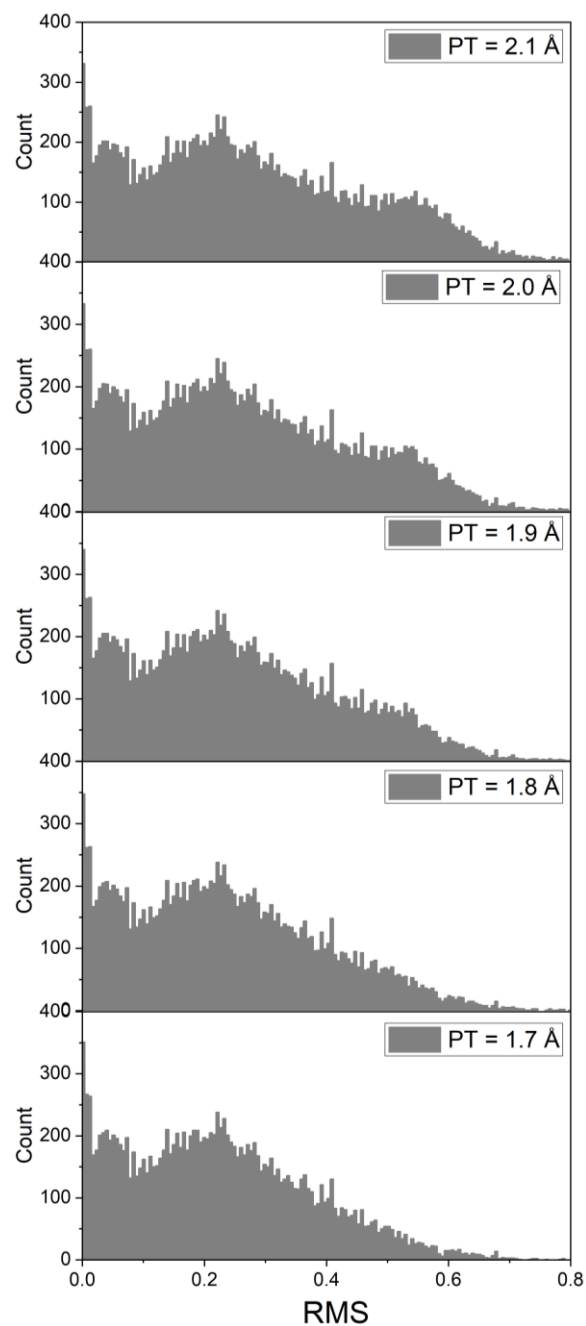

**Figure S1** - Reduction of Peak 4 (centred at RMS = 0.54 Å) with decreasing PT.

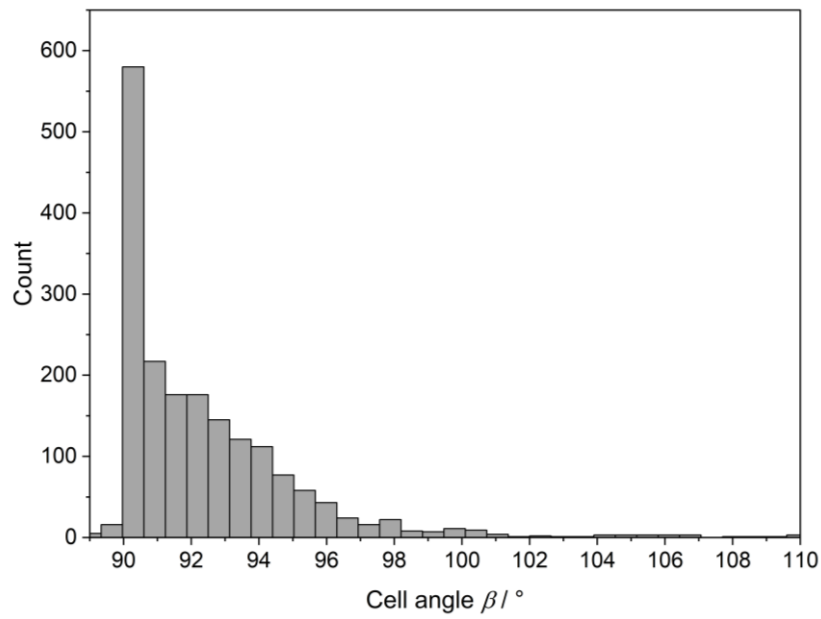

**Figure S2** – Histogram of FERROSCOPE HSS that are predicted to transition with a  $\Gamma$  mode distortion. The shape of the graph is a half-Gaussian centred at 90°. A spike at 90° is further evidence of PSTG structures.

The following CSD structures are known ferroelectric materials and were used to optimise FERROSCOPE:

UBOTIQ01  
 TUTKUR  
 CLCOPB11  
 JAWQUT01  
 FIBZOH01  
 HORFAV  
 FIGNER  
 YOCVAP  
 CATXED01  
 MAPJUI  
 ESAPOG01  
 DADTUY02  
 JAKQAA  
 RIDFOA01  
 NOQLEN  
 GEFLOV  
 REZBOP01  
 KOWYEA02  
 GUMMUW  
 MIGQOJ02  
 HEYNOR  
 COJCOV  
 JUJFEC  
 DOHDAI  
 NIWJUA02  
 IHIWON  
 XEGDUL  
 XEGFIB  
 VEFWAH01  
 WOLYUR01

ABIQOU  
ABIRAH  
SIYWUT  
UHAGAM04  
ATENIY  
YIBCIY  
FAWSAZ01  
UXIXAB02  
EWAJUK  
JEXWOZ02  
ELUQIM  
JEXWUF02  
CAJHUS01  
RUJBAC  
RUJBIK  
AMBACO07  
NONYUK02  
LIFCIM02  
KAVKIE01  
TEJKUO  
JAYPUU01  
KIVFIH  
OROWAV  
UFODEB  
IGEDUW  
IGEKOX  
TMAMNC  
DANFAC  
FOSGID  
THIOUR14  
SIWKEP  
KASXUY  
RIJVIS01  
AMHCLA01  
MEGJEP  
QODZER  
QIXKEQ01  
QIXKIU  
QODGUM04  
XOLXEE01  
XOMQUO01  
TIVDAF  
TIVFEL  
MUZCER  
BUJQIJ  
BUJQOP  
OHAMIW  
OHAMOC  
OHAMUI  
OHANAP  
CBUDCX  
PROLON  
TAPZIT  
WIZNAX01  
WERZUR  
BILHUC  
BILJOY  
BILNES

BILNOC  
BILNUI  
BILPOE01  
BILGAH  
BILHAI  
BILKEP  
BILLEQ  
BILLOA  
BILLUG  
BILMER  
BILKIT  
BILHIQ  
BILLIU  
KAVJUP05  
LOTBAA01  
BEFWOB01  
PIKDOC  
FINTAZ  
FINTIH  
TMPPIO03  
WULSAY  
IGEWID  
MIHTEE01  
QIVQIY  
LOLHIG04  
KNATAR05  
MUPDAF  
HEJGOV01  
WUKROM  
SOMDOO  
SOMDUU  
ANPHPR01  
LEQWAF  
YASKIP  
SUGJOW01  
AQAVIA01  
QUSTIK  
QUTFUJ  
GUALSU10  
GUCRSU  
MAMPUM02  
ZIYYOX  
ZIYYUD  
ZIYZAK  
FOXNUB07  
BOLDIP11  
QQQFAD03  
FUWWOL02  
WIVDUA05  
BIKREV  
SARCAC01  
HAXGOE01  
UZIWOQ  
JOJYOY  
JOJZAL  
XEMQIS  
JOPZUM  
POXQUR

AVUPIT  
AVUPUF  
CUYGIO  
QUKBIJ06  
TAKZUE  
NIXCOP  
JOYDOT  
JOYLUH  
DUNNUX  
DUNPAF
